# Supplementary material for: Thomson–Einstein’s Tea Leaf Paradox Revisited: Aggregation in Rings
Source: MDPI journal article supplement (doi:10.3390/mi14112024), 2023-10-30
Supplement: s1 [file s1]

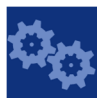

## Supplementary Materials

## Supplementary tables

**Table S1.** Simulation parameters.

|                                 |          |                         |                         |                         |
|---------------------------------|----------|-------------------------|-------------------------|-------------------------|
| Water at 21°C [14]              |          |                         |                         |                         |
| Density                         | $\rho_f$ | 997 kg m <sup>-3</sup>  |                         |                         |
| Dynamic viscosity               | $\mu_f$  | 0.00089 Pa s            |                         |                         |
| Tea leaf particle (fitted data) |          | 1                       | 2                       | 3                       |
| Particle radius                 | $r_p$    | 0.25 mm                 | 0.375 mm                | 0.5 mm                  |
| Particle density                | $\rho_p$ | 1023 kg m <sup>-3</sup> | 1015 kg m <sup>-3</sup> | 1007 kg m <sup>-3</sup> |

**Table S2.** Experimental particle radius and measured density.

| $r_p$ , mm | $t$ , s | $\rho_p$ , kg·m <sup>-3</sup> |
|------------|---------|-------------------------------|
| 0.24       | 73.7    | 1032                          |
| 0.52       | 71.2    | 1005                          |
| 0.48       | 43.1    | 1011                          |
| 0.37       | 46.9    | 1019                          |
| 0.41       | 66.7    | 1010                          |
| 0.27       | 112.3   | 1015                          |
| 0.36       | 70.6    | 1013                          |
| 0.36       | 69.3    | 1013                          |
| 0.22       | 108.4   | 1023                          |
| 0.50       | 70.8    | 1005                          |
| 0.52       | 50.4    | 1007                          |
| 0.44       | 46.4    | 1012                          |
| 0.27       | 71.9    | 1026                          |
| 0.26       | 108.4   | 1017                          |
| 0.39       | 54.0    | 1015                          |
| 0.37       | 61.3    | 1014                          |

**Table S3.** Lateral force compensation factor on a stationary spherical particle in a shear field.

| $z/r_p$  | $F_x^{s*}$ |
|----------|------------|
| $\infty$ | 1          |
| 10.0677  | 1.0587     |
| 3.7622   | 1.1671     |
| 2.3524   | 1.278      |
| 1.5431   | 1.4391     |
| 1.1276   | 1.616      |
| 1.0453   | 1.6682     |
| 1.005004 | 1.6969     |
| 1.003202 | 1.6982     |
| 1        | 1.7005     |

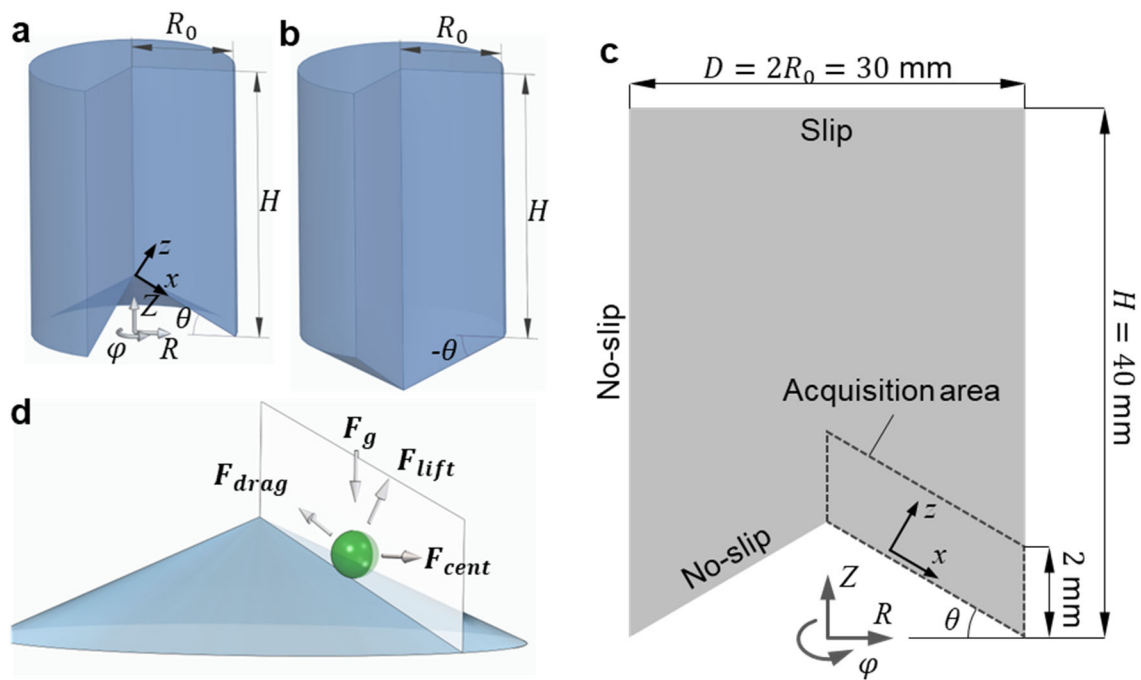

**Figure S1.** Schematic diagram demonstrating the fluid domain in a cylindrical container with a radius  $R_0$ , and height  $H$  in cylindrical coordinates  $(R, Z, \phi)$ . (a) Base geometries with concave inclinations (pointing upwards) are defined with a positive angle  $\theta$ , (b) geometries with convex inclinations (tapered downwards) are defined with a negative angle  $\theta$ . (c) Schematic diagram of the cross-section. (d) Forces acting on a swirling particle.

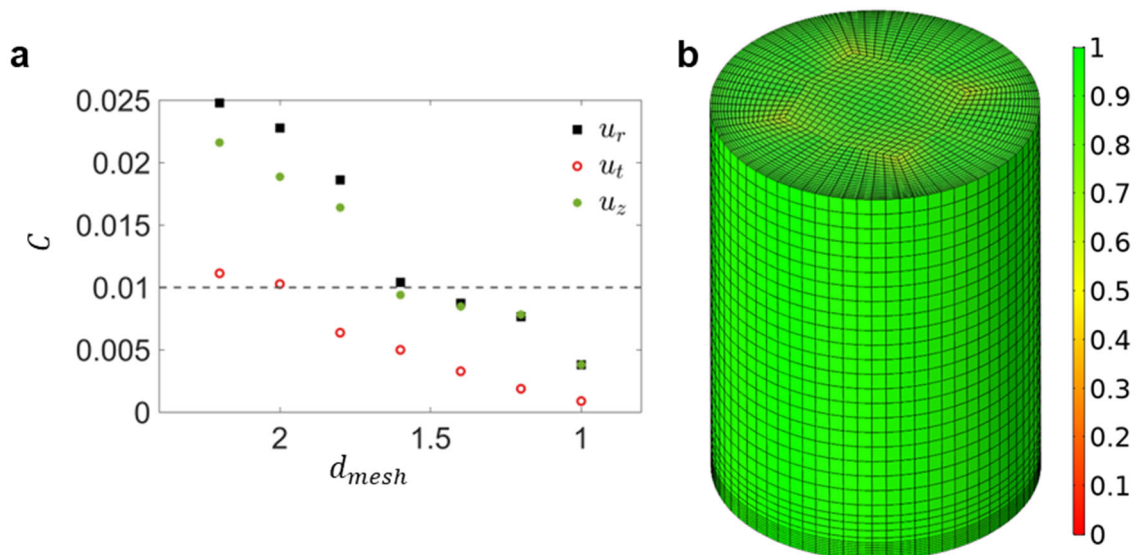

**Figure S2.** (a) Computational mesh convergence study (b) Computational mesh.

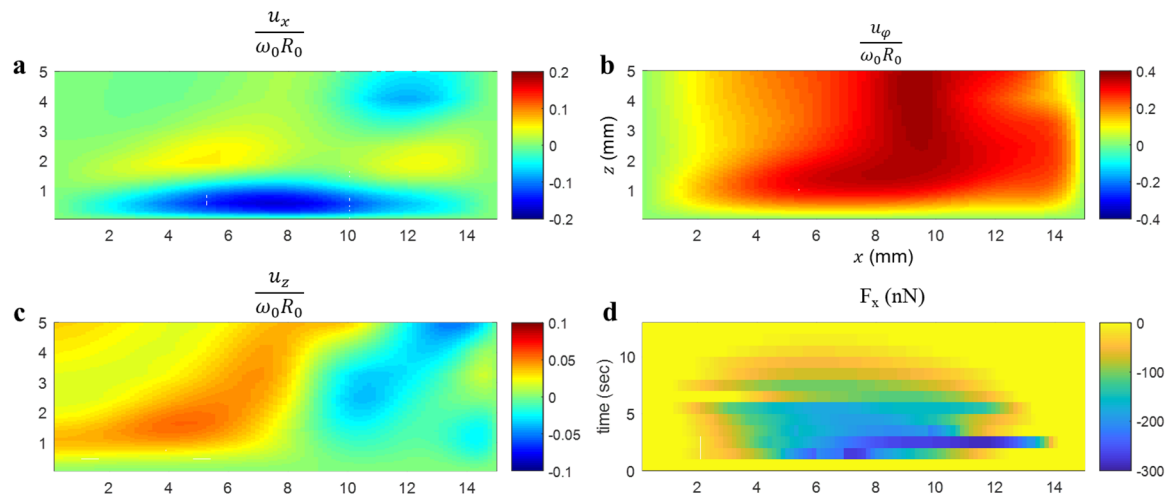

**Figure S3.** (a–c) Velocity components in the  $xz$ -plane near the bottom of the vessel 5 s after rotation termination. (d) The resulting force acting on the 0.375  $\mu\text{m}$  particle over time. The initial rotation rate is 80 RPM,  $\theta = 0$ .

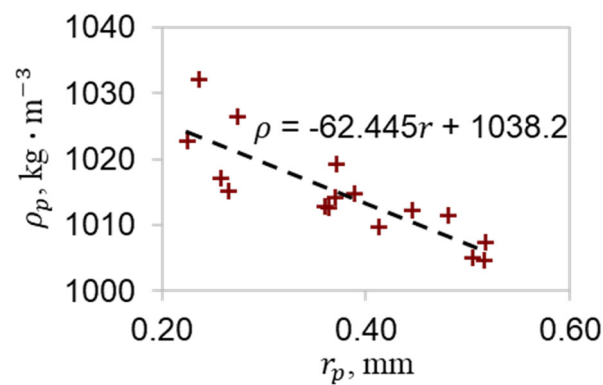

**Figure S4.** Effective tea-leaf density for particles of different radii. The data is fitted with a least-squares linear trendline overlaid.

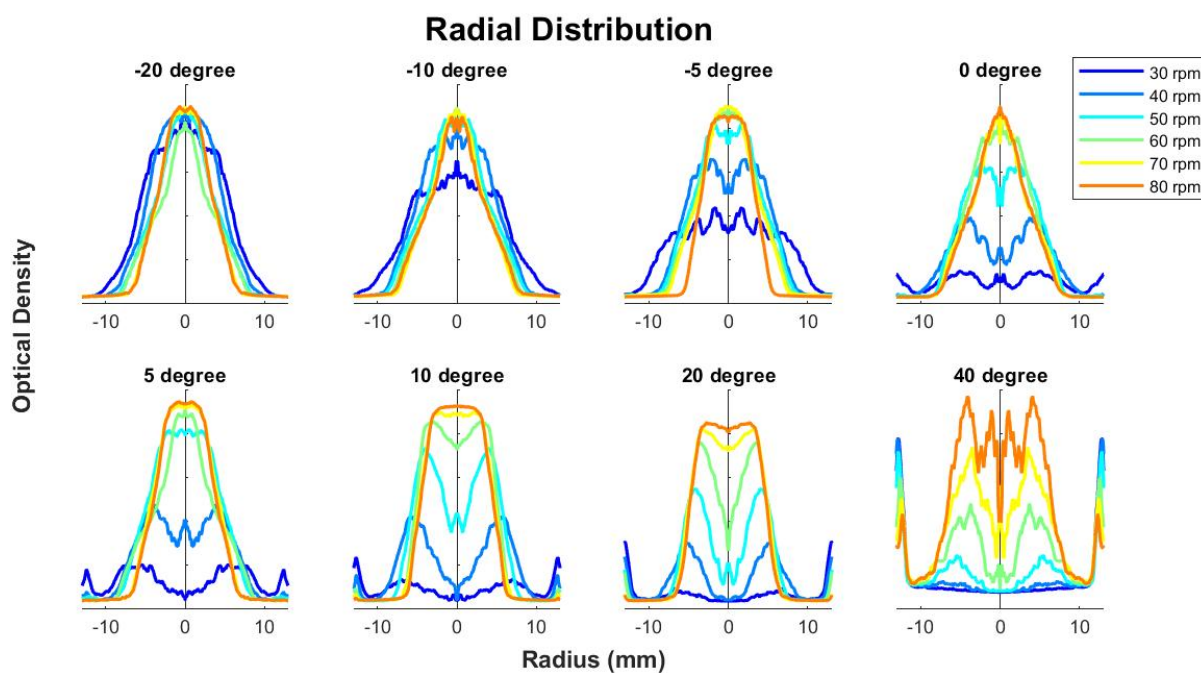

**Figure S5.** Radial density distribution of settled tea leaf particles in vessels with various bottom surface inclinations and rotational rates.

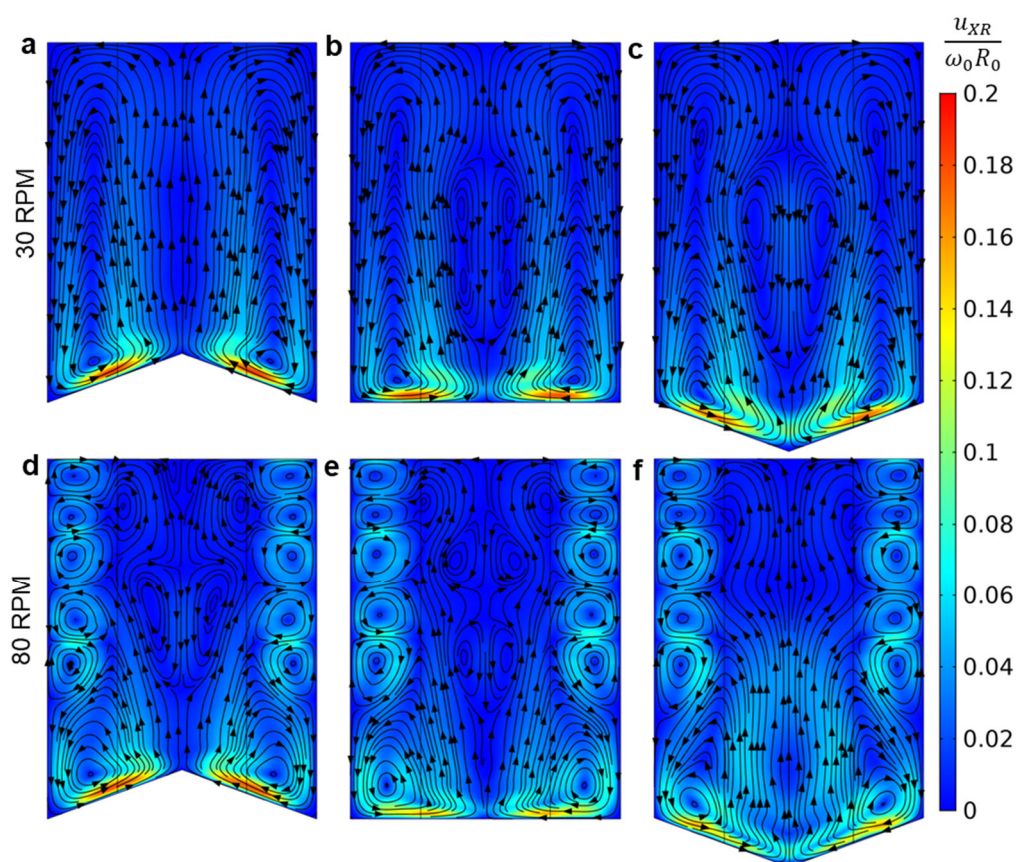

**Figure S6.** In-plane fluid velocity 5 seconds after the rotation stopped. The streamlines visualize local flow direction. Initial angular velocity is 30 RMP (a–c), 80 RPM (d–f). The base inclinations here are  $\theta = 20^\circ$  (a,d),  $\theta = 0^\circ$  (b,e),  $\theta = -20^\circ$  (c,f).
